# Supplementary material for: The Impact of a One-Dose versus Two-Dose Oral Cholera Vaccine Regimen in Outbreak Settings: A Modeling Study
Source: PubMed Central journal article supplement (PMC4549326; doi:10.1371/journal.pmed.1001867), 2015-08-25
Supplement: pmed.1001867.s002.pdf [file pmed.1001867.s002.pdf]

# Performance of One- versus Two-Dose Oral Cholera Vaccine Campaigns in Response to Outbreaks

## *S1 Text: Overview of Transmission Models*

Andrew S. Azman, Francisco J. Luquero, Iza Ciglenecki, Rebecca F. Grais, David A. Sack, and Justin Lessler

We built a set of Susceptible Exposed Infectious Recovered (SEIR) models to encompass different aspects of cholera transmission and ways in which OCV may protect individuals. The most general model is the ‘two-path’ model which allows for both person-to-person and environmentally mediated transmission and other models include only a single transmission pathway. Parameters shared by all models are displayed in Table S1-1 and additional parameters are shown in the subsections below. In the deterministic versions used in the main text, the transmission parameter  $\beta$  was fit (through minimization of the squared residuals) to the observed daily case reports from a 2008/9 epidemic in Bissau City, Guinea Bissau.<sup>1</sup>

Table S1-1: Core parameters used in deterministic transmission models

| Parameter            | Desc.                                                   | Value                           | Source        |
|----------------------|---------------------------------------------------------|---------------------------------|---------------|
| $1 \setminus \sigma$ | Mean latent period (assumed equal to incubation period) | 1.41 <i>days</i>                | 2             |
| $1 \setminus \gamma$ | Mean duration of infectiousness                         | 2.0 <i>days</i>                 | 3             |
| $\rho_1$             | Vaccination rate for first dose                         | varied                          | 4             |
| $\rho_2$             | Vaccination rate for first dose                         | varied                          | 4             |
| $\beta$              | Transmission parameter                                  | 0.654 <i>days</i> <sup>-1</sup> | calibrated    |
| $\theta_1$           | 1-dose vaccine efficacy                                 | varied                          | meta-analysis |
| $\theta_2$           | 2-dose vaccine efficacy                                 | varied                          | meta-analysis |

### All-or-Nothing Vaccination Model

With all-or-nothing vaccination  $\theta_1$  (i.e. VE) of the individuals vaccinated with dose 1 are expected to be 100% protected from infection. In this two-dose all-or-nothing model, we create states for unvaccinated (subscript 0), single-dose vaccinated (subscript 1), two-dose vaccinated (subscript 2). Only those individuals who have received a first dose are at risk of receiving a second dose. With the second vaccination,  $\frac{1-\theta_2}{1-\theta_1}$  of those unprotected from the first dose ( $S_1$ ) remain unprotected moving to  $S_2$ . The additional individuals protected per second dose given to an unprotected first dose recipient is:

$$\begin{aligned} \text{additional protected with second dose} &= \overbrace{\frac{\theta_2}{1-\theta_1}}^{\text{total protected after 2-doses}} - \underbrace{\frac{\theta_1}{1-\theta_1}}_{\text{total protected after 1-dose}} \quad (1) \\ &= \frac{\theta_2 - \theta_1}{(1-\theta_1)} \quad (2) \end{aligned}$$

This model can be described by the following system of differential equations:

$$N_i = S_i + E_i + I_i + R_i \quad i \in (0, 1, 2) \quad (3)$$

$$\lambda = \frac{\beta (I_0 + I_1 + I_2)}{\sum_{i \in (0,1,2)} N_i} \quad (4)$$

$$\frac{dS_0}{dt} = -\lambda S_0 - \rho_1(t) \frac{S_0}{N_0} \quad (5)$$

$$\frac{dS_1}{dt} = -\lambda S_1 + (1 - \theta_1) \rho_1(t) \frac{S_0}{N_0} - \rho_2(t) \frac{S_1}{N_1} \quad (6)$$

$$\frac{dS_2}{dt} = -\lambda S_2 + \frac{1 - \theta_2}{1 - \theta_1} \rho_2(t) \frac{S_1}{N_1} \quad (7)$$

$$\frac{dE_0}{dt} = \lambda S_0 - \sigma E_0 - \rho_1(t) \frac{E_0}{N_0} \quad (8)$$

$$\frac{dE_1}{dt} = \lambda S_1 - \sigma E_1 - \rho_2(t) \frac{E_1}{N_1} + \rho_1(t) \frac{E_0}{N_0} \quad (9)$$

$$\frac{dE_2}{dt} = \lambda S_2 - \sigma E_2 + \rho_2(t) \frac{E_1}{N_1} \quad (10)$$

$$\frac{dI_0}{dt} = \sigma E_0 - \rho_1(t) \frac{I_0}{N_0} - \gamma I_0 \quad (11)$$

$$\frac{dI_1}{dt} = \sigma E_1 - \rho_2(t) \frac{I_1}{N_1} - \gamma I_1 + \rho_1(t) \frac{I_0}{N_0} \quad (12)$$

$$\frac{dI_2}{dt} = \sigma E_2 + \rho_2(t) \frac{I_1}{N_1} - \gamma I_2 \quad (13)$$

$$\frac{dR_0}{dt} = \gamma I_0 - \rho_1(t) \frac{R_0}{N_0} \quad (14)$$

$$\frac{dR_1}{dt} = \gamma I_1 + \theta_1 \rho_1(t) \frac{S_0}{N_0} + \rho_1(t) \frac{R_0}{N_0} - \rho_2(t) \frac{R_1}{N_1} \quad (15)$$

$$\frac{dR_2}{dt} = \gamma I_2 + \frac{\theta_2 - \theta_1}{1 - \theta_1} \rho_2(t) \frac{S_1}{N_1} + \rho_2(t) \frac{R_1}{N_1} \quad (16)$$

### Susceptibility-Reducing Vaccine Model ( $VE_S$ )

Our first leaky vaccine model ( $VE_S$ ) reduces the risk of infection by  $\theta$ . in all vaccinees. Figure S1-1 illustrates the model structure and flows between states; with circles representing states and edges representing rates of transition from one state to another.

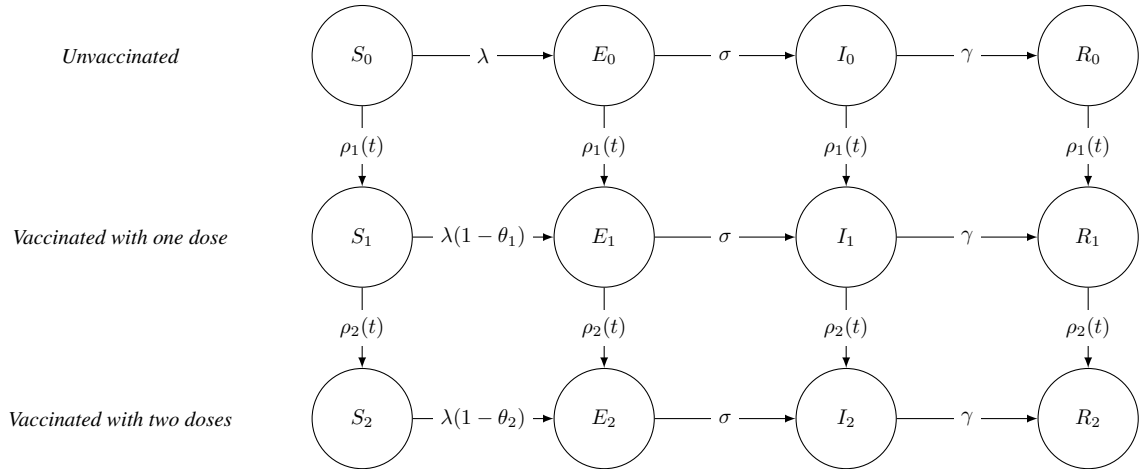

Figure S1-1: Flow diagram of susceptibility-reducing vaccine model  $VE_S$  Model

The following system of equations describes the  $VE_S$  vaccine model:

$$N_i = S_i + E_i + I_i + R_i \quad i \in (0, 1, 2) \quad (17)$$

$$\lambda = \frac{\beta}{\sum_{i=0,1,2} N} (I_0 + I_1 + I_2) \quad (18)$$

$$\frac{dS_0}{dt} = -\lambda S_0 - \rho_1(t) \frac{S_0}{N_0} \quad (19)$$

$$\frac{dS_1}{dt} = -\lambda(1 - \theta_1)S_1 + \rho_1(t) \frac{S_0}{N_0} - \rho_2(t) \frac{S_1}{N_1} \quad (20)$$

$$\frac{dS_2}{dt} = -\lambda(1 - \theta_2)S_2 + \rho_2(t) \frac{S_1}{N_1} \quad (21)$$

$$\frac{dE_0}{dt} = \lambda S_0 - \rho_1(t) \frac{E_0}{N_0} - \sigma E_0 \quad (22)$$

$$\frac{dE_1}{dt} = \lambda S_1(1 - \theta_1) + \rho_1(t) \frac{E_0}{N_0} - \rho_2(t) \frac{E_1}{N_1} - \sigma E_1 \quad (23)$$

$$\frac{dE_2}{dt} = \lambda S_2(1 - \theta_2) + \rho_2(t) \frac{E_1}{N_1} - \sigma E_2 \quad (24)$$

$$\frac{dI_0}{dt} = \sigma E_0 - \rho_1 \frac{I_0}{N_0} - \gamma I_0 \quad (25)$$

$$\frac{dI_1}{dt} = \sigma E_1 + \rho_1 \frac{I_0}{N_0} - \rho_2(t) \frac{I_1}{N_1} - \gamma I_1 \quad (26)$$

$$\frac{dI_2}{dt} = \sigma E_2 + \rho_2(t) \frac{I_1}{N_1} - \gamma I_2 \quad (27)$$

$$\frac{dR_0}{dt} = \gamma I_0 - \rho_1(t) \frac{R_0}{N_0} \quad (28)$$

$$\frac{dR_1}{dt} = \gamma I_1 + \rho_1 \frac{R_0}{N_0} - \rho_2(t) \frac{I_1}{N_1} \quad (29)$$

$$\frac{dR_2}{dt} = \gamma I_2 + \rho_2(t) \frac{R_1}{N_1} \quad (30)$$

### Severity-Reducing Vaccine Model ( $VE_{SP}$ )

The second leaky model considered reduces the probability  $(1 - \theta.)$  of an individual progressing to severe symptomatic disease required the addition of a mildly-symptomatic/asymptomatic class ( $A$ ). This model is described by the system of ordinary differential equations below and additional parameters are shown in Table S1-2.

Table S1-2: Additional parameters for  $VE_{SP}$  model

| Parameter  | Desc.                                                      | Value | Source  |
|------------|------------------------------------------------------------|-------|---------|
| $\theta_0$ | Probability of asymptomatic infection without OCV          | 0     | assumed |
| $\kappa$   | Reduced infectiousness for asymptomatic/mildly symptomatic | 0.9   | assumed |

The following system of equations describes the leaky severity-reducing vaccine model:

$$N_i = S_i + E_i + I_i + A_i + R_i \quad i \in (0, 1, 2) \quad (31)$$

$$\lambda = \frac{\beta}{\sum_{i=0,1,2} N} (I + I_1 + I_2 + (1 - \kappa)(A_1 + A_2)) \quad (32)$$

$$\frac{dS_0}{dt} = -\lambda S_0 - \rho_1(t) \frac{S_0}{N_0} \quad (33)$$

$$\frac{dS_1}{dt} = -\lambda S_1 + \rho_1(t) \frac{S_0}{N_0} - \rho_2(t) \frac{S_1}{N_1} \quad (34)$$

$$\frac{dS_2}{dt} = -\lambda S_2 + \rho_2(t) \frac{S_1}{N_1} \quad (35)$$

$$\frac{dE_0}{dt} = \lambda S_0 - \rho_1(t) \frac{E_0}{N_0} - \sigma E_0 \quad (36)$$

$$\frac{dE_1}{dt} = \lambda S_1 + \rho_1(t) \frac{E_0}{N_0} - \rho_2(t) \frac{E_1}{N_1} - \sigma E_1 \quad (37)$$

$$\frac{dE_2}{dt} = \lambda S_2 + \rho_2(t) \frac{E_1}{N_1} - \sigma E_2 \quad (38)$$

$$\frac{dI_0}{dt} = (1 - \theta_0)\sigma E_0 - \rho_1(t) \frac{I_0}{N_0} - \gamma I_0 \quad (39)$$

$$\frac{dI_1}{dt} = (1 - \theta_1)\sigma E_1 + \rho_1(t) \frac{I_0}{N_0} - \rho_2(t) \frac{I_1}{N_1} - \gamma I_1 \quad (40)$$

$$\frac{dI_2}{dt} = (1 - \theta_2)\sigma E_2 + \rho_2(t) \frac{I_1}{N_1} - \gamma I_2 \quad (41)$$

$$\frac{dA_0}{dt} = \theta_0\sigma E_0 - \rho_1(t) \frac{A_0}{N_0} - \gamma A_0 \quad (42)$$

$$\frac{dA_1}{dt} = \theta_1\sigma E_1 + \rho_1(t) \frac{A_0}{N_0} - \rho_2(t) \frac{A_1}{N_1} - \gamma A_1 \quad (43)$$

$$\frac{dA_2}{dt} = \theta_2\sigma E_2 + \rho_2(t) \frac{A_1}{N_1} - \gamma A_2 \quad (44)$$

$$\frac{dR_0}{dt} = \gamma(I_0 + A_0) - \rho_1(t) \frac{R_0}{N_0} \quad (45)$$

$$\frac{dR_1}{dt} = \gamma(I_1 + A_1) + \rho_1(t) \frac{R_0}{N_0} - \rho_2(t) \frac{R_1}{N_1} \quad (46)$$

$$\frac{dR_2}{dt} = \gamma(I_2 + A_2) + \rho_2(t) \frac{R_1}{N_1} \quad (47)$$

## Two-path Transmission Model

Cholera is thought to spread via two modes of transmission, a ‘fast’ route dominated by person-to-person transmission, and a ‘slow’ route where transmission is mediated through the environment.<sup>5</sup> The mix of these two modes help dictate the time course of the epidemic by modifying the generation time distribution (i.e. distribution of time between infector-infected pairs). In the primary analyses we consider a subset of this model where transmission is 100% fast. Here we also consider this full two-path model to explore the impact of varying contributions of environmentally mediated (slow) transmission. The slow path is conceptualized as a series of infectious compartments which leads to a gamma (Erlang) distributed infectious period (Figure S1-2). Vaccine is implemented within this model as a leaky vaccine that reduces vaccinees susceptibility to infection ( $VE_S$ ).

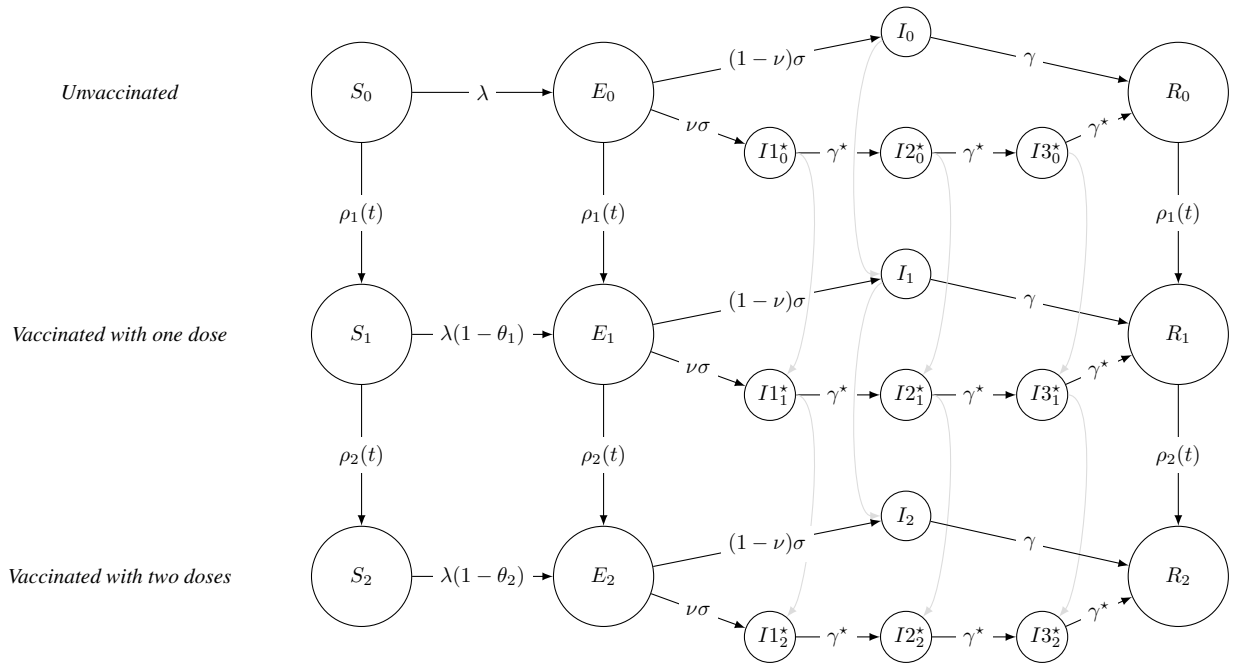

Figure S1-2: Flow diagram of two-path model. Rates from infectious compartments shown as grey edges for visualization purposes.

The infectious period distribution was fit to empirical data on the survival of *Vibrio cholerae* (Figures S1-3 and S1-4) by minimizing the squared difference between the observations and the survival function of a gamma distribution.<sup>6</sup> We found the best fit to include three compartments ( $n_{slow} = 3$ , see section Supplemental Text S4) each with a mean residence time of 7.5 days ( $\gamma^* = \frac{1}{7.5}$  See Supplemental Text S4).

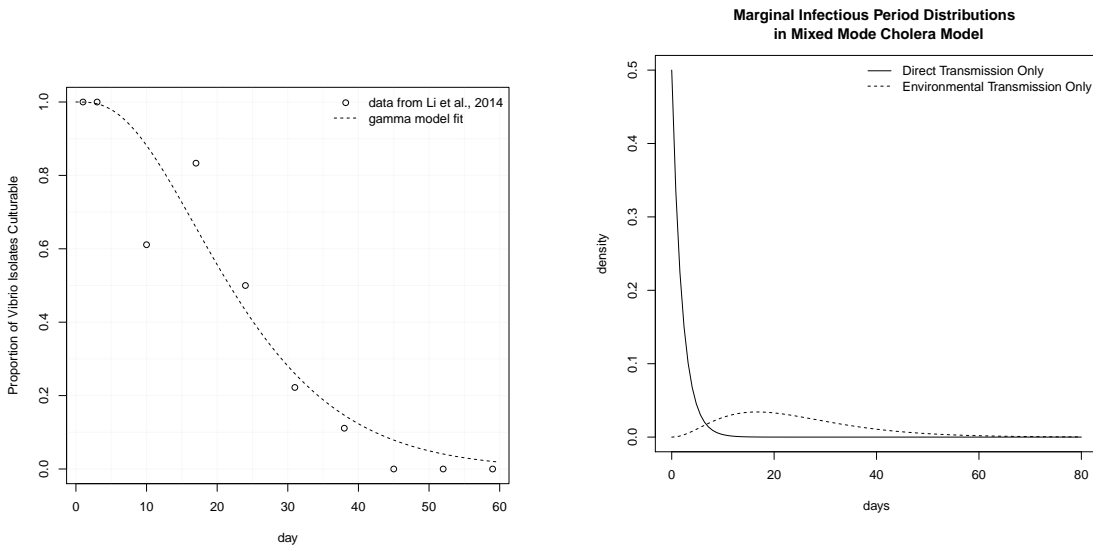

Figure S1-3: Proportion of *Vibrio cholerae* isolates surviving at different time points (from<sup>6</sup>) along with best fit gamma distributed survival curve.

Figure S1-4: Distributions of the infectious period for the fast (person-to-person) and the slow (environmentally-mediated transmission) pathways.

## References

- [1] Luquero FJ, Banga CN, Remartínez D, Palma PP, Baron E, Grais RF. Cholera Epidemic in Guinea-Bissau (2008): The Importance of “Place”. *PloS one*. 2011 May;6(5):e19005.
- [2] Azman AS, Rudolph KE, Cummings DAT, Lessler J. The incubation period of cholera: a systematic review. *The Journal of infection*. 2013 May;66(5):432–438.
- [3] Weil AA, Khan AI, Chowdhury F, LaRocque RC, Faruque ASG, Ryan ET, et al. Clinical Outcomes in Household Contacts of Patients with Cholera in Bangladesh. *Clinical Infectious Diseases*. 2009 Nov;49(10):1473–1479.
- [4] Ciglenecki I, Sakoba K, Luquero FJ, Heile M, Itama C, Mengel M, et al. Feasibility of mass vaccination campaign with oral cholera vaccines in response to an outbreak in Guinea. *PLoS Medicine*. 2013;10(9):e1001512.
- [5] Morris JG. Cholera—modern pandemic disease of ancient lineage. *Emerging Infectious Diseases*. 2011 Nov;17(11):2099–2104.
- [6] Li XQ, Wang M, Deng ZA, Shen JC, Zhang XQ, Liu YF, et al. Survivability and molecular variation in *Vibrio cholerae* from epidemic sites in China. *Epidemiology and Infection*. 2014 Mar;p. 1–10.
