# Supplementary material for: The Impact of a One-Dose versus Two-Dose Oral Cholera Vaccine Regimen in Outbreak Settings: A Modeling Study
Source: PubMed Central journal article supplement (PMC4549326; doi:10.1371/journal.pmed.1001867), 2015-08-25
Supplement: pmed.1001867.s003.pdf [file pmed.1001867.s003.pdf]

# Performance of One- versus Two-Dose Oral Cholera Vaccine Campaigns in Response to Outbreaks: A Modeling Study

## *S2 Text: Introduction to Minimum Relative Single-Dose Efficacy (MSRE)*

Andrew S. Azman, Francisco J. Luquero, Iza Ciglenecki, Rebecca F. Grais, David A. Sack, and Justin Lessler

We express the main results in terms of the minimum relative single-dose efficacy, which is equal to the single-dose efficacy needed for a single-dose campaign to avert as many cases as a two-dose campaign with the same total number of doses divided by the two-dose vaccine efficacy ( $\delta_2$ ). Relative vaccine efficacy below this threshold will lead to fewer cases when a single-dose campaign is employed compared to a two-dose campaign with a fixed number of doses. Figure S2-1 illustrates that the MRSE depends on the two-dose vaccine effectiveness and the quantity of vaccine. We can see from Figure S2-1 (purple points) that the highest two-dose effectiveness considered (0.88, the upper limit of the 95% CI from the meta-analysis) bounds all the other MRSE estimates (i.e., the simulations with 1,000 and 500,000 doses of a vaccine with a single-dose efficacy of 0.88 bound all of the other estimates consistent with the data). Therefore, in order to capture uncertainty in the two-dose efficacy estimates, in the main text we conservatively present results from simulations using a two-dose effectiveness of 0.88 unless otherwise mentioned.

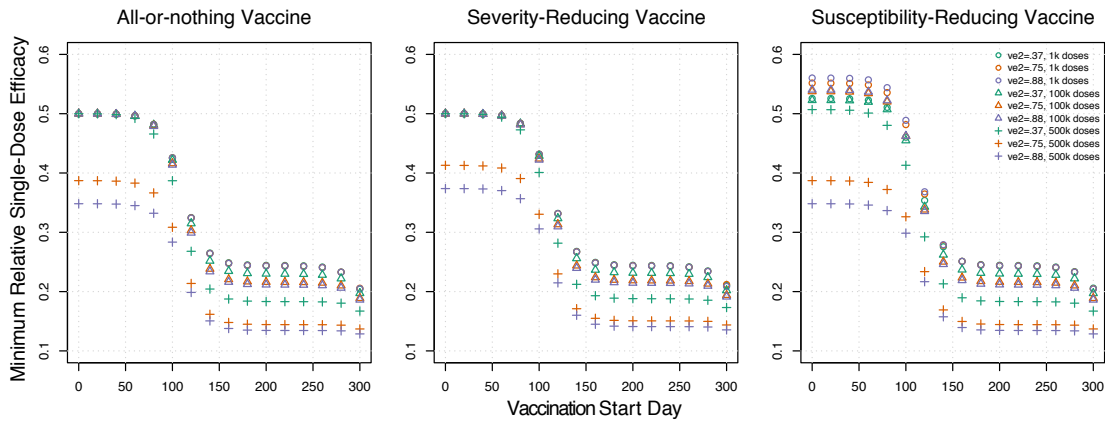

Figure S2-1: Illustration of MRSE for varying two-dose vaccine efficacies and vaccine coverage. Two-dose vaccine efficacies spanning the limits of the 95% confidence intervals from the random effects model, and doses varied between enough for 0.2% to 100% of the population in a single-dose campaign.

In a simple proactive vaccination setting where a vaccine acts by removing individuals from Susceptible to Removed ('all-or-nothing vaccine',<sup>1</sup>), the *MRSE* can be derived using an adaptation of the final size equations described by Longini et al. in 1978.<sup>2</sup> The system below represents the final size for one ( $Z_1(\infty, v_1, \delta_1)$ ) and two-dose  $Z_2(\infty, v_2, \delta_2)$  campaigns.

$$Z_1(\infty, v_1, \delta_1) = (S_1(0) - \delta_1 v_1) \left( 1 - \exp \left( -\frac{\mathcal{R}_0 Z_1(\infty, v_1, \delta_1)}{N_1} \right) \right) \quad (1)$$

$$Z_2(\infty, v_2, \delta_2) = (S_2(0) - \delta_2 v_2) \left( 1 - \exp \left( -\frac{\mathcal{R}_0 Z_2(\infty, v_2, \delta_2)}{N_2} \right) \right), \quad (2)$$

where  $v_1$  represent the number of individuals vaccinated in a single dose campaign and  $v_2$  (individuals vaccinated in a two dose campaign) is assumed to be  $v_1/2$ . To estimate the MRSE, we can set  $N_1 = N_2$  and  $S_1 = S_2$  since they are the same population and then set  $Z_1 = Z_2$  and solve for  $\frac{\delta_1}{\delta_2}$  as follows:

$$(S_1(0) - \delta_2 \frac{v_1}{2}) \left( 1 - \exp \left( -\frac{\mathcal{R}_0 Z_1}{N_1} \right) \right) = (S_1(0) - \delta_1 v_1) \left( 1 - \exp \left( -\frac{\mathcal{R}_0 Z_1}{N_1} \right) \right) \quad (3)$$

$$(S_1(0) - \delta_2 \frac{v_1}{2}) = (S_1(0) - \delta_1 v_1) \quad (4)$$

$$\frac{\delta_1}{\delta_2} = \frac{1}{2} \quad (5)$$

Thus in a simple all-or-nothing proactive vaccination setting, a single dose must be at least half as efficacious as two doses to avert at least as many cases over the course of the epidemic.

## References

- [1] Halloran ME, Struchiner CJ, Longini IM. Design and Analysis of Vaccine Studies. Springer Verlag; 2009.
- [2] Longini IM, Ackerman E, Elveback LR. An optimization model for influenza A epidemics. Mathematical biosciences. 1978 Jan;38(1-2):141–157.
